# Supplementary material
Source: MDPI journal article supplement (https://www.mdpi.com/2073-4395/11/6/1070)
Supplement: s1 [file s1]

## Supplementary tables

**Table S1** – p values of the post hoc Tukey's HSD test on repeated measure ANOVA for each dependent variable per DOY (181, 196, 211, 226, 241) per year (2017 vs. 2018).

| Comparison         |                    | Stem water potential (MPa)                                                |        |              |        | Net photosynthesis<br>( $\mu\text{mol CO}_2 \text{ m}^{-2} \text{ s}^{-1}$ ) |       |              |       |
|--------------------|--------------------|---------------------------------------------------------------------------|--------|--------------|--------|------------------------------------------------------------------------------|-------|--------------|-------|
|                    |                    | Primary leaf                                                              |        | Lateral leaf |        | Primary leaf                                                                 |       | Lateral leaf |       |
|                    |                    | 2017                                                                      | 2018   | 2017         | 2018   | 2017                                                                         | 2018  | 2017         | 2018  |
| Day of<br>the year | Day of<br>the year | p Value                                                                   |        |              |        | p Value                                                                      |       |              |       |
| 181                | 196                | 1                                                                         | <0.001 | 0.984        | <0.001 | 0.804                                                                        | 0.110 | 0.460        | 0.819 |
|                    | 211                | <0.001                                                                    | <0.001 | 0.145        | <0.001 | 0.002                                                                        | 0.060 | <0.001       | 0.994 |
|                    | 226                | <0.001                                                                    | 0.091  | <0.001       | 0.996  | 0.005                                                                        | 0.019 | <0.001       | 0.934 |
|                    | 241                | <0.001                                                                    | 0.796  | 0.009        | 0.018  | 0.003                                                                        | 0.969 | <0.001       | 0.588 |
| 196                | 211                | <0.001                                                                    | 0.979  | 0.057        | 0.013  | <0.001                                                                       | 0.997 | <0.001       | 0.959 |
|                    | 226                | <0.001                                                                    | 0.014  | <0.001       | <0.001 | <0.001                                                                       | 0.882 | <0.001       | 0.383 |
|                    | 241                | <0.001                                                                    | <0.001 | 0.003        | <0.001 | <0.001                                                                       | 0.304 | <0.001       | 0.993 |
| 211                | 226                | 0.001                                                                     | 0.015  | <0.001       | <0.001 | 0.983                                                                        | 0.973 | 1            | 0.767 |
|                    | 241                | 0.979                                                                     | <0.001 | 0.609        | <0.001 | 0.997                                                                        | 0.182 | <0.001       | 0.810 |
| 226                | 241                | 0.004                                                                     | 0.010  | 0.017        | 0.009  | 1                                                                            | 0.063 | <0.001       | 0.209 |
|                    |                    | Transpiration rate<br>( $\text{mmol H}_2\text{O m}^{-2} \text{ s}^{-1}$ ) |        |              |        | Stomatal conductance<br>( $\text{mmol H}_2\text{O m}^{-2} \text{ s}^{-1}$ )  |       |              |       |
|                    |                    | Primary leaf                                                              |        | Lateral leaf |        | Primary leaf                                                                 |       | Lateral leaf |       |
|                    |                    | 2017                                                                      | 2018   | 2017         | 2018   | 2017                                                                         | 2018  | 2017         | 2018  |
| Day of<br>the year | Day of<br>the year | p Value                                                                   |        |              |        | p Value                                                                      |       |              |       |
| 181                | 196                | 0.356                                                                     | 0.907  | 0.349        | 0.183  | 0.120                                                                        | 0.993 | 0.230        | 1     |
|                    | 211                | 0.747                                                                     | 1      | 0.271        | 0.378  | 0.157                                                                        | 0.210 | 0.116        | 0.991 |
|                    | 226                | 0.232                                                                     | 0.256  | 0.281        | 0.994  | 0.165                                                                        | 0.061 | 0.047        | 0.332 |
|                    | 241                | 0.861                                                                     | 0.052  | 0.146        | 0.852  | 0.085                                                                        | 0.977 | 0.127        | 0.544 |
| 196                | 211                | 0.955                                                                     | 0.924  | 1            | 0.988  | 0.661                                                                        | 0.102 | 0.910        | 0.981 |
|                    | 226                | 0.998                                                                     | 0.713  | 1            | 0.340  | 0.642                                                                        | 0.027 | 0.996        | 0.291 |
|                    | 241                | 0.885                                                                     | 0.010  | 0.004        | 0.029  | 0.847                                                                        | 0.855 | 0.892        | 0.599 |
| 211                | 226                | 0.859                                                                     | 0.276  | 1            | 0.607  | 1                                                                            | 0.952 | 0.987        | 0.577 |
|                    | 241                | 0.999                                                                     | 0.047  | 0.003        | 0.074  | 0.997                                                                        | 0.470 | 1            | 0.307 |
| 226                | 241                | 0.744                                                                     | <0.001 | 0.003        | 0.633  | 0.995                                                                        | 0.168 | 0.982        | 0.021 |

**Table S2** – p values of post hoc Tukey's HSD test on repeated measure ANOVA for each dependent variable per treatment (ELR/NLR; MT/CT) per year (2017 vs. 2018).

| Comparison |           | Stem water potential (MPa)                                                |       |              |         | Net photosynthesis<br>( $\mu\text{mol CO}_2 \text{ m}^{-2} \text{ s}^{-1}$ ) |       |              |       |
|------------|-----------|---------------------------------------------------------------------------|-------|--------------|---------|------------------------------------------------------------------------------|-------|--------------|-------|
|            |           | Primary leaf                                                              |       | Lateral leaf |         | Primary leaf                                                                 |       | Lateral leaf |       |
|            |           | 2017                                                                      | 2018  | 2017         | 2018    | 2017                                                                         | 2018  | 2017         | 2018  |
| Treatment  | Treatment | p Value                                                                   |       |              |         | p Value                                                                      |       |              |       |
| NLR MT     | ELR MT    | < 0.001                                                                   | 0.179 | 0.002        | 0.045   | < 0.001                                                                      | 0.949 | 0.678        | 0.099 |
|            | NLR CT    | 0.421                                                                     | 0.458 | 0.706        | 0.038   | < 0.001                                                                      | 0.013 | < 0.001      | 0.014 |
|            | ELR CT    | 1                                                                         | 0.991 | 0.609        | 0.391   | < 0.001                                                                      | 0.134 | < 0.001      | 0.004 |
| ELR MT     | NLR CT    | < 0.001                                                                   | 0.014 | < 0.001      | < 0.001 | < 0.001                                                                      | 0.005 | < 0.001      | 0.688 |
|            | ELR CT    | < 0.001                                                                   | 0.277 | < 0.001      | 0.003   | < 0.001                                                                      | 0.055 | < 0.001      | 0.287 |
| NLR CT     | ELR CT    | 0.383                                                                     | 0.315 | 0.998        | 0.479   | 0.51                                                                         | 0.538 | 0.979        | 0.869 |
|            |           | Transpiration rate<br>( $\text{mmol H}_2\text{O m}^{-2} \text{ s}^{-1}$ ) |       |              |         | Stomatal conductance<br>( $\text{mmol H}_2\text{O m}^{-2} \text{ s}^{-1}$ )  |       |              |       |
|            |           | Primary leaf                                                              |       | Lateral leaf |         | Primary leaf                                                                 |       | Lateral leaf |       |
|            |           | 2017                                                                      | 2018  | 2017         | 2018    | 2017                                                                         | 2018  | 2017         | 2018  |
| Treatment  | Treatment | p Value                                                                   |       |              |         | p Value                                                                      |       |              |       |
| NLR MT     | ELR MT    | 0.032                                                                     | 0.820 | 0.002        | 0.078   | 0.999                                                                        | 0.281 | 0.476        | 0.049 |
|            | NLR CT    | 0.333                                                                     | 0.955 | 0.501        | 0.800   | 0.853                                                                        | 0.356 | 0.890        | 0.143 |
|            | ELR CT    | 0.998                                                                     | 0.583 | 0.655        | 0.987   | 0.994                                                                        | 0.014 | 0.997        | 0.196 |
| ELR MT     | NLR CT    | 0.002                                                                     | 0.983 | 0.027        | 0.320   | 0.902                                                                        | 0.998 | 0.867        | 0.916 |
|            | ELR CT    | 0.044                                                                     | 0.973 | 0.017        | 0.135   | 0.999                                                                        | 0.326 | 0.593        | 0.834 |
| NLR CT     | ELR CT    | 0.258                                                                     | 0.861 | 0.993        | 0.937   | 0.945                                                                        | 0.256 | 0.956        | 0.997 |
